# Supplementary material
Source: publisher figshare collection journal article supplement (https://frontiersin.figshare.com/ndownloader/files/34351700)
Supplement: Supplementary file 1 [file 34351700]

Supplementary Material Saccò et al.

## Supplementary Figures


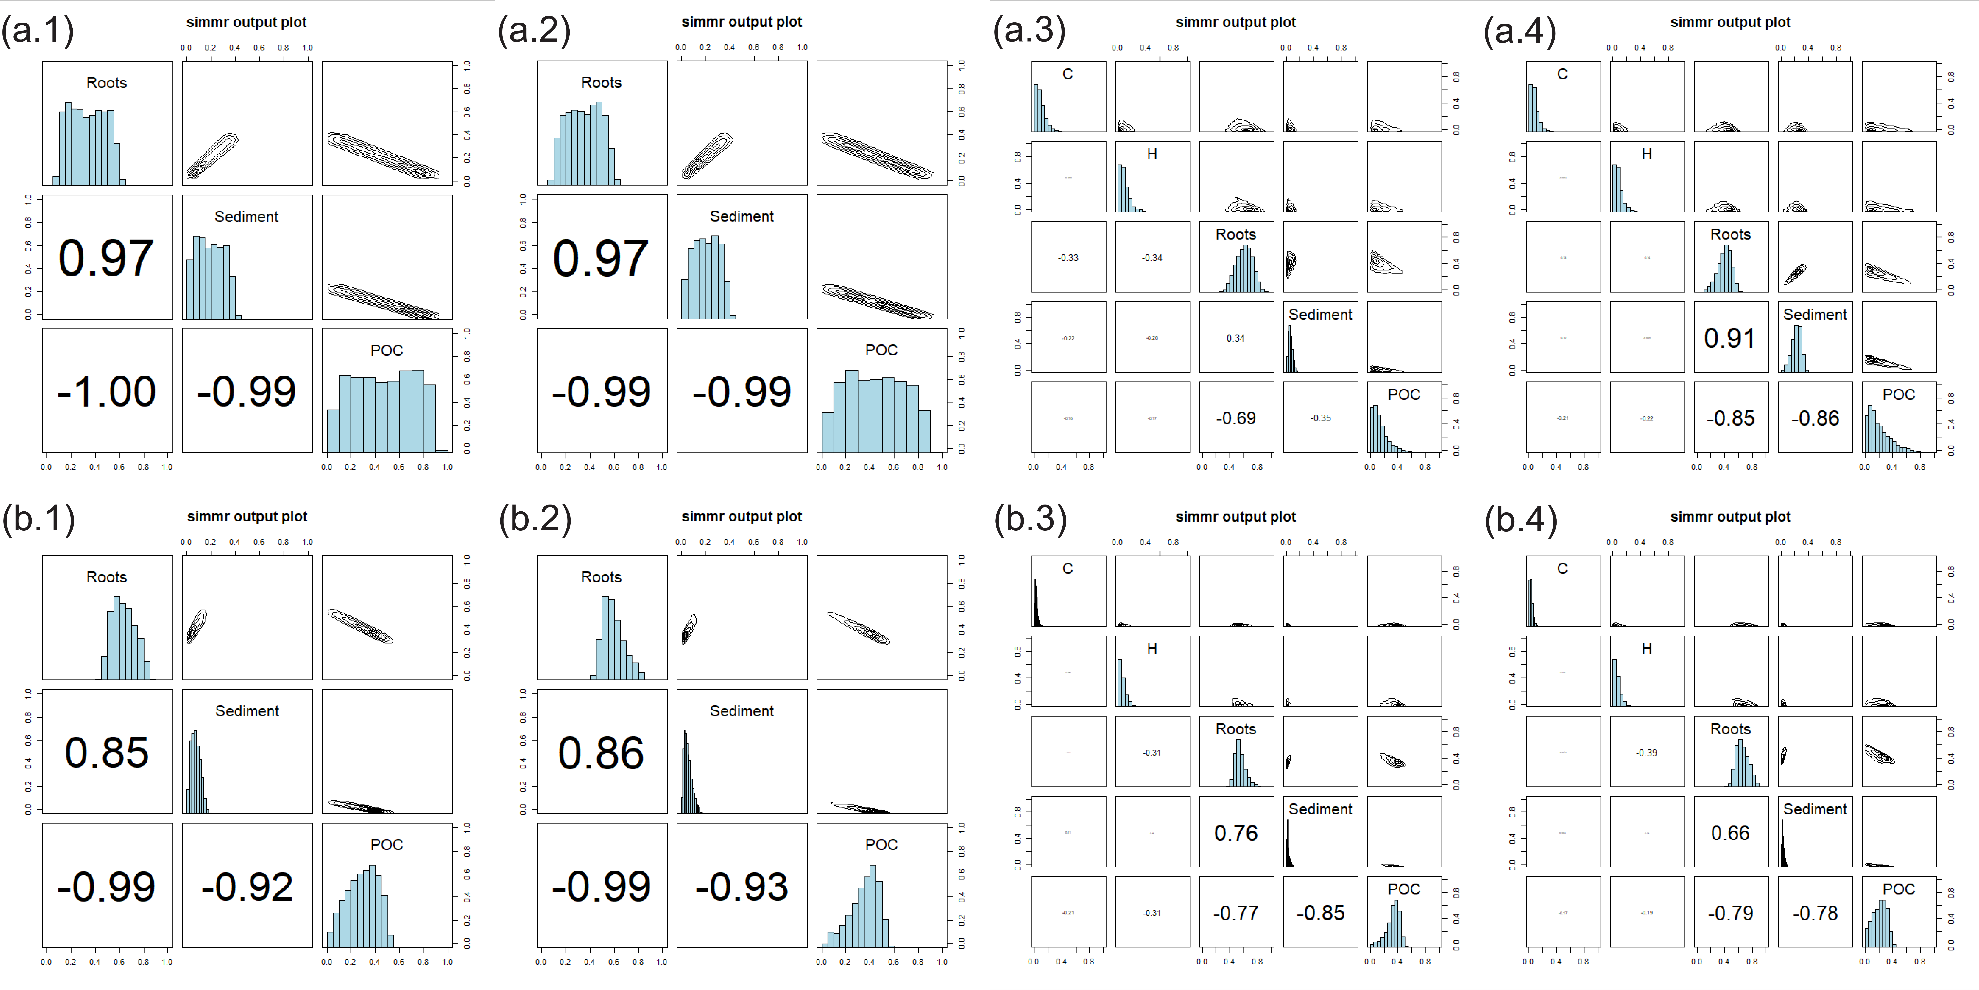


**Supplementary Figure 1. SIMM plots on the correlations between sources for C, H, AM1 and AM2 under LR (a.1, a.2, a.3 and a.4, respectively) and HR (b.1, b.2, b.3 and b.4, respectively)**. Source histograms on the diagonal, contour plots of the relationship between the sources on the upper diagonal, and the correlation between the sources on the lower diagonal are displayed.

## Supplementary Tables

**Supplementary Table 1. Carbon and nitrogen isotopic ratios for δ13C and δ15N SIA (together with the % of C and N) and Δ14C values (in ‰) of Copepoda Cyclopoida (C), Copepoda Harpacticoida (H), Amphipoda *Scutachiltonia axfordi* (AM1), Amphipoda *Yilgarniella sturtensis* (AM2), Roots (R), Sediment (S) and Particulate Organic Carbon (POC).**

| **Sample** | **ID** | **LR** | | | | | **HR** | | | | |
| --- | --- | --- | --- | --- | --- | --- | --- | --- | --- | --- | --- |
| **%C** | **δ13C** | **%N** | **δ15N** | **Δ14C** | **%C** | **δ13C** | **%N** | **δ15N** | **Δ14C** |
| Cyclopoida | C | 0.11 | -20.45±0.301 | 0.11 | 13.90±0.301 | -5.60±5.602 | 0.80 | -21.91±0.301 | 0.12 | 14.50±0.301 | -14.70±6.702 |
| Harpacticoida | H | 0.10 | -20.60±0.301 | 0.10 | 11.90±0.80 | -5.60±5.602 | 0.50 | -23.50±0.301 | 0.08 | 15.80±0.80 | -14.70±6.702 |
| *S. axfordi* | AM1 | 57.70 | -24.14±0.301 | 2.80 | 10.71±0.301 | 19.90±4.80 | 64.60 | -26.88±0.05 | 2.30 | 8.81±0.09 | -9.60±9.90 |
| *Y. sturtensis* | AM2 | 58.30 | -24.55±0.301 | 2.80 | 9.99±0.301 | -3.70±3.60 | 63.70 | -27.10±0.301 | 2.20 | 8.50±0.301 | -0.90±8.10 |
| Roots | R | 46.60 | -20.57±0.301 | 0.51 | 5.10±2.00 | 27.70±3.00 | 41.30 | -20.90±0.31 | 0.92 | 12.10±0.301 | 24.90±4.70 |
| Sediment | S | 3.00 | -10.33±0.301 | 0.05 | 11.00±1.20 | -780.30±32.10 | 2.40 | -9.65±0.31 | 0.02 | 11.40±1.20 | -428.00±51.70 |
| Particulate Organic Carbon | POC | 1.20 | -21.58±0.10 | 0.10 | 10.73±0.10 | -141.70±7.60 | 0.40 | -26.47±0.1 | 0.01 | 8.35±0.10 | -366.70±2.80 |
| 1Accuracy of the CF-iRMS (unique runs) |  |  |  |  |  |  |  |  |  |  |  |
| 2Homogeneised values |  |  |  |  |  |  |  |  |  |  |  |
|  |  |  |  |  |  |  |  |  |  |  |  |

**Supplementary Table 2. Dietary contributions (in %) of copepods C and H and amphipods AM1 and AM2 under LR and HR.**

|  | **Contributions (%)** | | | | | | | | | |
| --- | --- | --- | --- | --- | --- | --- | --- | --- | --- | --- |
|  | **LR** | | | | | **HR** | | | | |
|  | **Roots** | **Sediment** | **POC** | **C** | **H** | **Roots** | **Sediment** | **POC** | **C** | **H** |
| C | 33.7±14.3 | 19.2±10.8 | 47.1±24.9 | / | / | 63.4±9.3 | 7.4±3.8 | 29.2±12.6 | / | / |
| H | 34.9±13.5 | 20.3±10.2 | 44.8±23.6 | / | / | 59.6±8.8 | 5.4±3.3 | 35±11.8 | / | / |
| AM1 | 61±11.8 | 5.9±3.1 | 14.5±11.6 | 9.3±7.1 | 9.3±7.3 | 55.1±7.9 | 2.8±2.1 | 32.5±10 | 3±2.1 | 6.6±5.5 |
| AM2 | 39.9±9.8 | 22.2±6.9 | 21.5±16.9 | 8.1±6 | 8.3±6.2 | 65.8±8.9 | 3±1.9 | 21.2±10 | 3.2±2.2 | 6.8±5.5 |
